# Supplementary material
Source: MDPI journal article supplement (https://www.mdpi.com/search?q=toxins-11-00431)
Supplement: s001 [file toxins-11-00431-s001.pdf]

## Supplementary Materials: Association of *Nrf2*, *SOD2* and *GPX1* Polymorphisms with Biomarkers of Oxidative Distress and Survival in End-Stage Renal Disease Patients

Djurdja Jerotic, Marija Matic, Sonja Suvakov, Katarina Vucicevic, Tatjana Damjanovic, Ana Savic-Radojevic, Marija Pljesa-Ercegovac, Vesna Coric, Aleksandra Stefanovic, Jasmina Ivanisevic, Zorana Jelic-Ivanovic, Lana McClements, Nada Dimkovic and Tatjana Simic

**Table S1.** Summary of covariate testing in overall survival model building.

| Covariate                                                           | <i>p</i> -value |               |              |                 |
|---------------------------------------------------------------------|-----------------|---------------|--------------|-----------------|
|                                                                     | Base            | Uni-covariate | Bi-covariate | Three-Covariate |
| Age (years)                                                         | <0.001          | +             | +            | +               |
| <i>GPX1</i> ( <i>Pro/Pro</i> and <i>Pro/Leu</i> vs <i>Leu/Leu</i> ) | n.s.            | n.s.          | n.s.         | n.s.            |
| <i>GSTM1</i> ( <i>null</i> vs <i>active</i> )                       | <0.05           | <0.05         | +            | +               |
| <i>Nrf2</i> ( <i>C/A</i> and <i>A/A</i> vs <i>C/C</i> )             | n.s.            | n.s.          | n.s.         | n.s.            |
| <i>SOD2</i> ( <i>Val/Ala</i> vs <i>Val/Val</i> )                    | n.s.            | n.s.          | n.s.         | n.s.            |
| <i>SOD2_GPX1</i>                                                    | n.s.            | <0.05         | n.s.         | n.s.            |
| <i>SOD2_GSTM1</i>                                                   | n.s.            | n.s.          | n.s.         | n.s.            |
| <i>SOD2_Nrf2</i>                                                    | n.s.            | n.s.          | n.s.         | n.s.            |
| <i>GPX1_Nrf2</i>                                                    | n.s.            | <0.05         | <0.05        | +               |
| <i>GPX1_GSTM1</i>                                                   | n.s.            | n.s.          | n.s.         | n.s.            |
| <i>Nrf2_GSTM1</i>                                                   | n.s.            | n.s.          | n.s.         | n.s.            |

n.s. – not significant; + - covariate included in the model.

**Table S2.** Final population parameter values for the overall survival model.

| Parameter                                                             | Estimated Value | Standard Error |
|-----------------------------------------------------------------------|-----------------|----------------|
| $T_{pop}$                                                             | 139             | 17.8           |
| Age (years) effect on T                                               | -2.27           | 0.5            |
| <i>GSTM1</i> ( <i>null</i> ) effect on T                              | -0.357          | 0.168          |
| <i>Nrf2</i> + <i>GPX1</i> ( <i>C/C</i> + <i>Leu/Leu</i> ) effect on T | 0.765           | 0.347          |
| Variance of T                                                         | 0.649           | 0.113          |

$T_{pop}$ —population scale parameter indicating time at which survival equals 0.

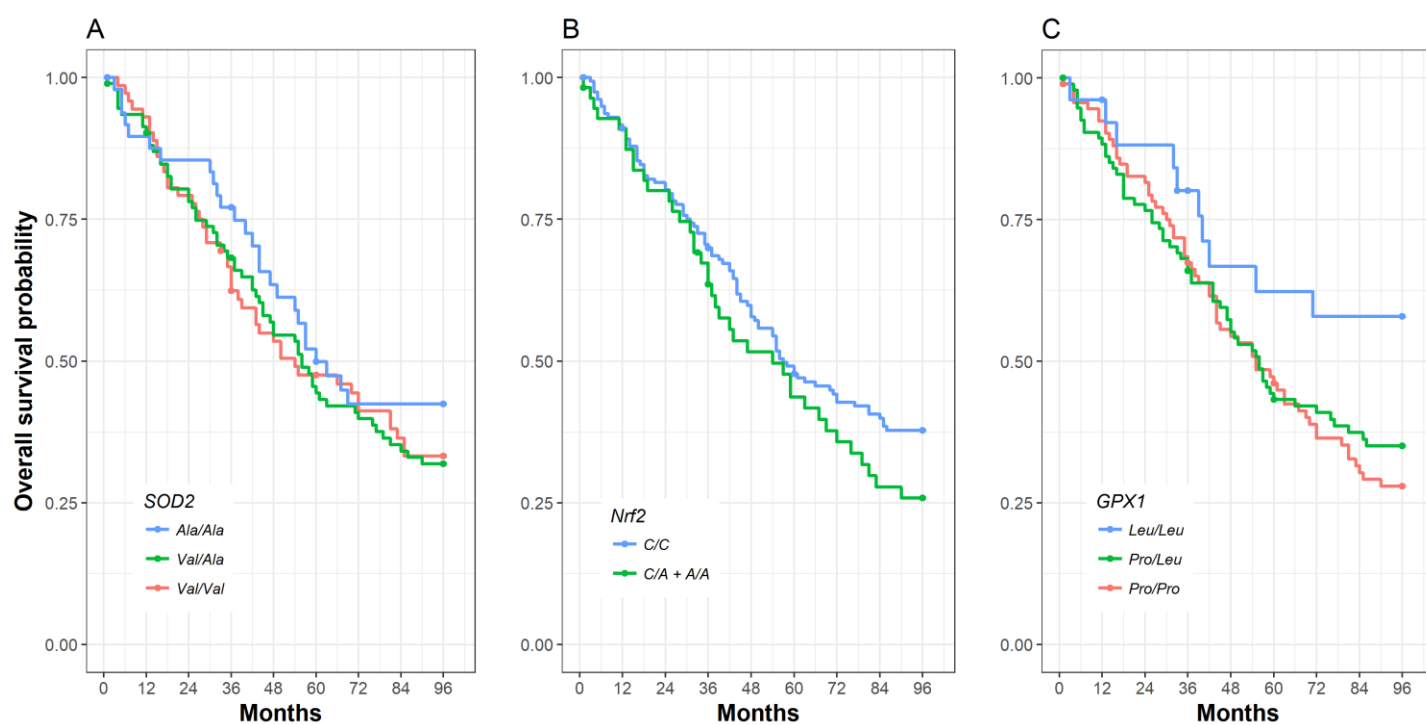

**Figure S1.** Empirical Kaplan-Meier curve (lines) and censored data (circle) for overall survival data based *SOD2* (A), *Nrf2* (B) and *GPX1* (C) genotype.

**Table S3.** Summary of covariate testing in cardiovascular survival model building.

| Covariate                                             | <i>p</i> -value |               |              |                 |
|-------------------------------------------------------|-----------------|---------------|--------------|-----------------|
|                                                       | Base            | Uni-Covariate | Bi-Covariate | Three-Covariate |
| Age (years)                                           | <0.005          | +             | +            | +               |
| GPX1 ( <i>Pro/Pro</i> and <i>Pro/Leu vs Leu/Leu</i> ) | n.s.            | n.s.          | <0.05        | +               |
| GSTM1 ( <i>active vs null</i> )                       | n.s.            | <0.01         | +            | +               |
| Nrf2 ( <i>C/A and A/A vs C/C</i> )                    | n.s.            | n.s.          | n.s.         | n.s.            |
| SOD2 ( <i>Val/Ala vs Val/Val</i> )                    | n.s.            | n.s.          | n.s.         | n.s.            |
| SOD2_GPX1                                             | n.s.            | n.s.          | n.s.         | n.s.            |
| SOD2_GSTM1                                            | n.s.            | <0.05         | n.s.         | n.s.            |
| SOD2_Nrf2                                             | n.s.            | n.s.          | n.s.         | n.s.            |
| GPX1_Nrf2                                             | n.s.            | n.s.          | n.s.         | n.s.            |
| GPX1_GSTM1                                            | n.s.            | n.s.          | n.s.         | n.s.            |
| Nrf2_GSTM1                                            | n.s.            | p<0.05        | n.s.         | n.s.            |

n.s.—not significant; + - covariate included in the model.

**Table S4.** Final population parameter values for the cardiovascular survival model.

| <b>Parameter</b>                  | <b>Estimated Value</b> | <b>Standard Error</b> |
|-----------------------------------|------------------------|-----------------------|
| $T_{pop}$                         | 169                    | 34                    |
| Age effect on T                   | -2.61                  | 0.796                 |
| <i>GPX1 (Leu/Leu)</i> effect on T | 0.849                  | 0.457                 |
| <i>GSTM1 (null)</i> effect on T   | -0.632                 | 0.227                 |
| $p_{pop}$                         | 1.64                   | 0.357                 |
| Variance of T                     | 0.954                  | 0.205                 |

$T_{pop}$ —population scale parameter indicating time at which survival equals 0.4;  $p_{pop}$  – population shape parameter.

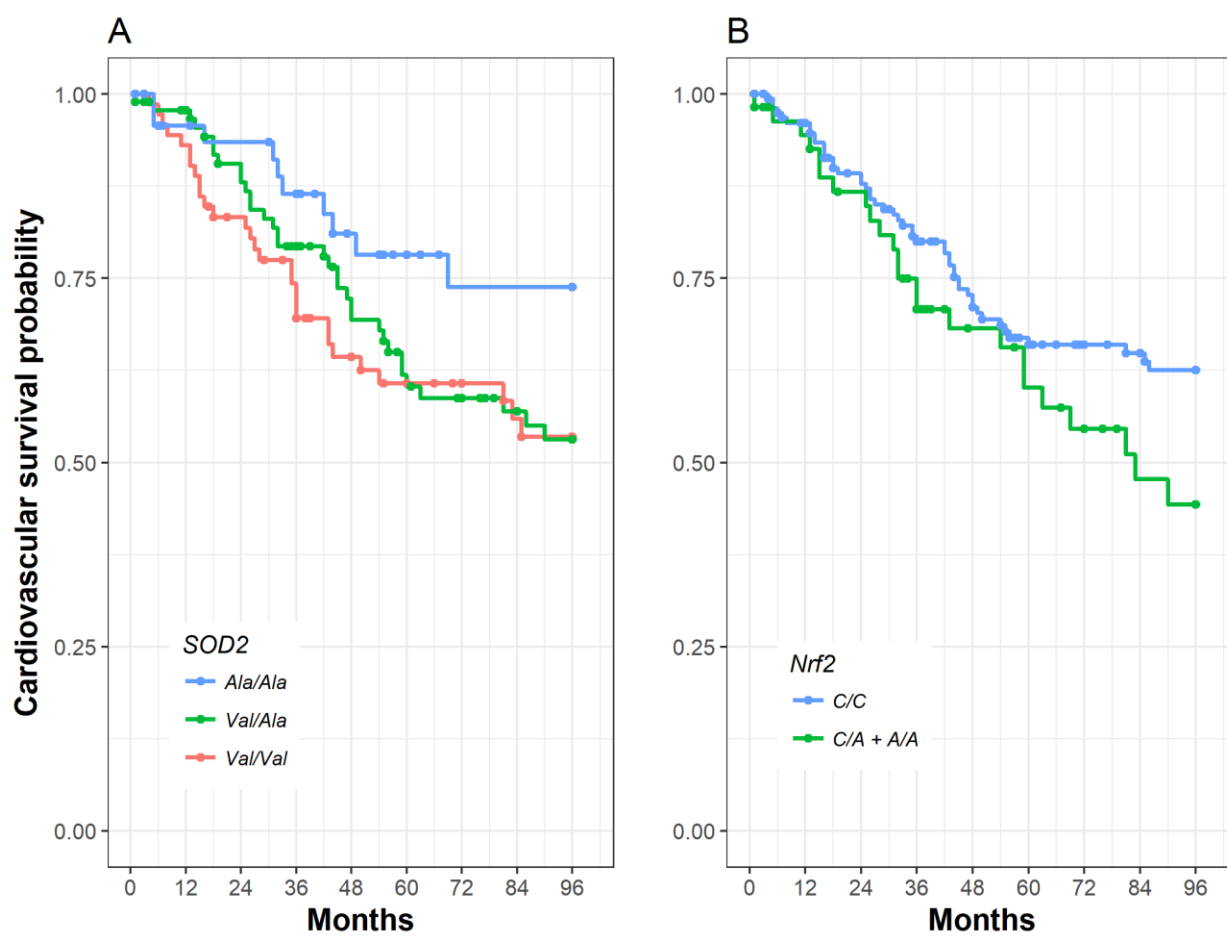

**Figure S2.** Empirical Kaplan-Meier curve (lines) and censored data (circle) for cardiovascular survival data given for *SOD2* (A) and *Nrf2* (B) genotype.
